# Supplementary material
Source: publisher figshare collection journal article supplement (https://frontiersin.figshare.com/ndownloader/files/33849239)
Supplement: Supplementary file [file 33849239]

## Supplementary Material

### 1. Supplementary Figures and Tables

#### 1.1. Supplementary Figures

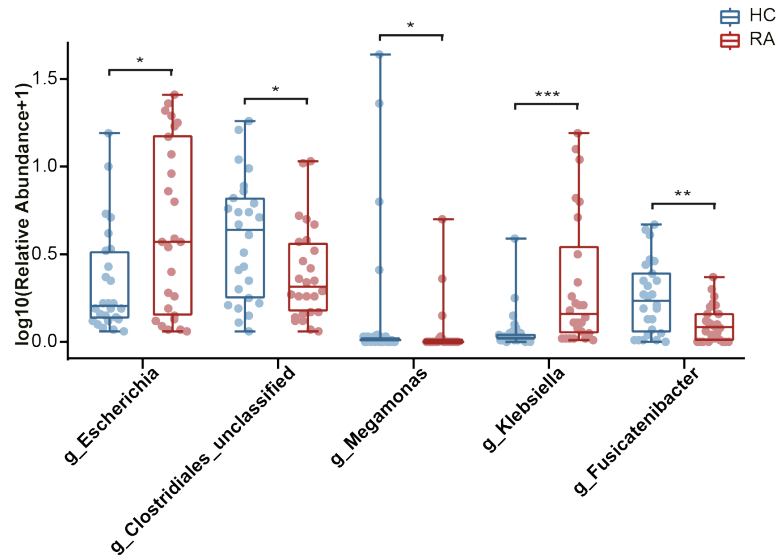

**Supplementary Figure 1** The Wilcoxon test showed that 5 genera were significantly altered in RA patients among the top 30 richest genera. P-value: \*p<0.05; \*\*p<0.01 \*\*\*p<0.001

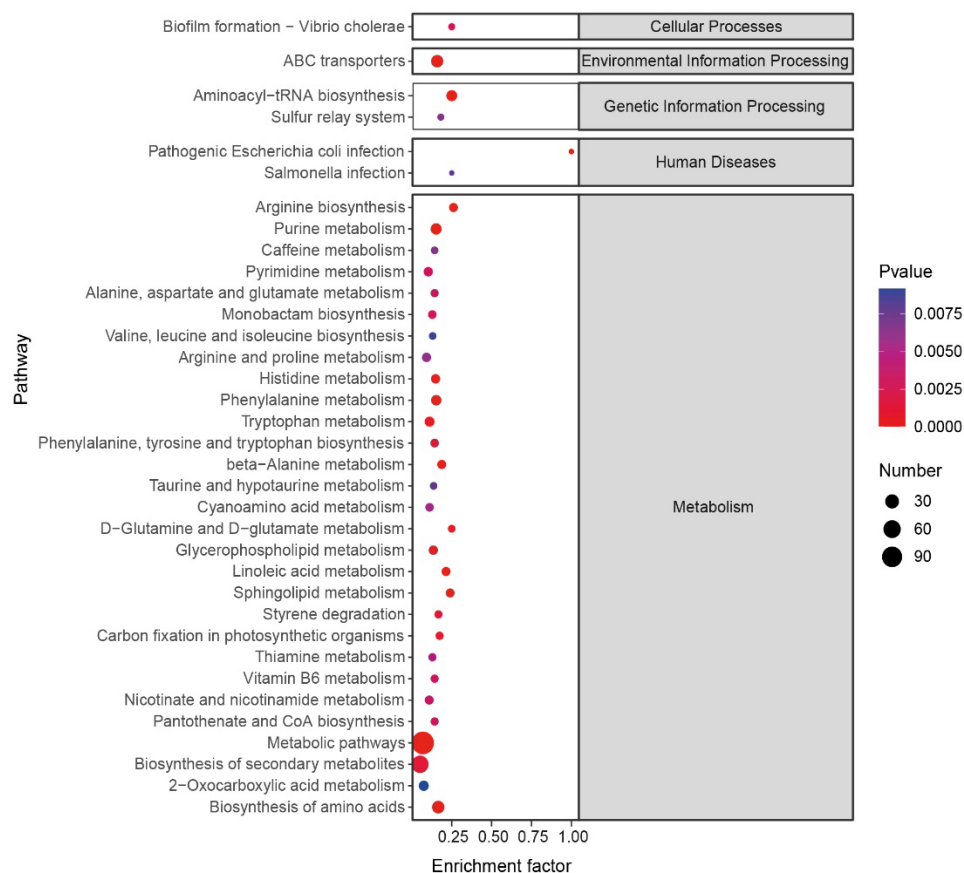

**Supplementary Figure 2** The KEGG pathway enrichment analysis of MS2 metabolites. 35 significantly enriched pathways were obtained (FDR < 0.05).

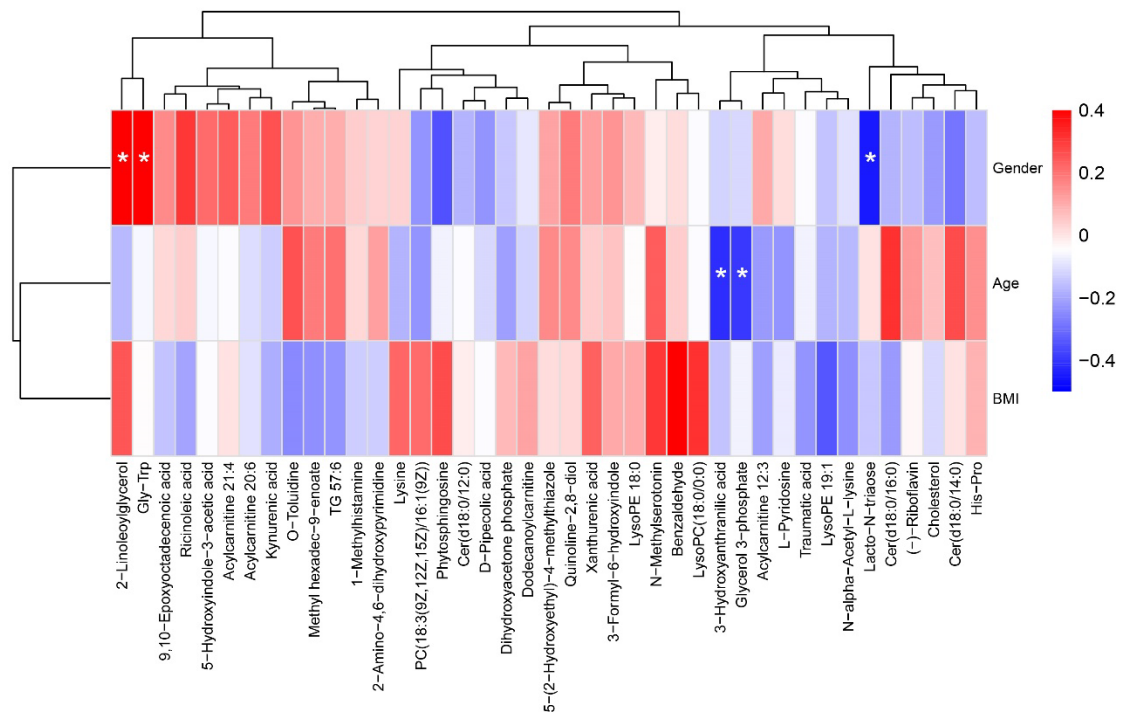

**Supplementary Figure 3** The heatmap revealed the correlations between possible confounders (gender, age and BMI) and the significantly altered metabolites (Spearman's correlation analysis). P-value, \*p<0.05.

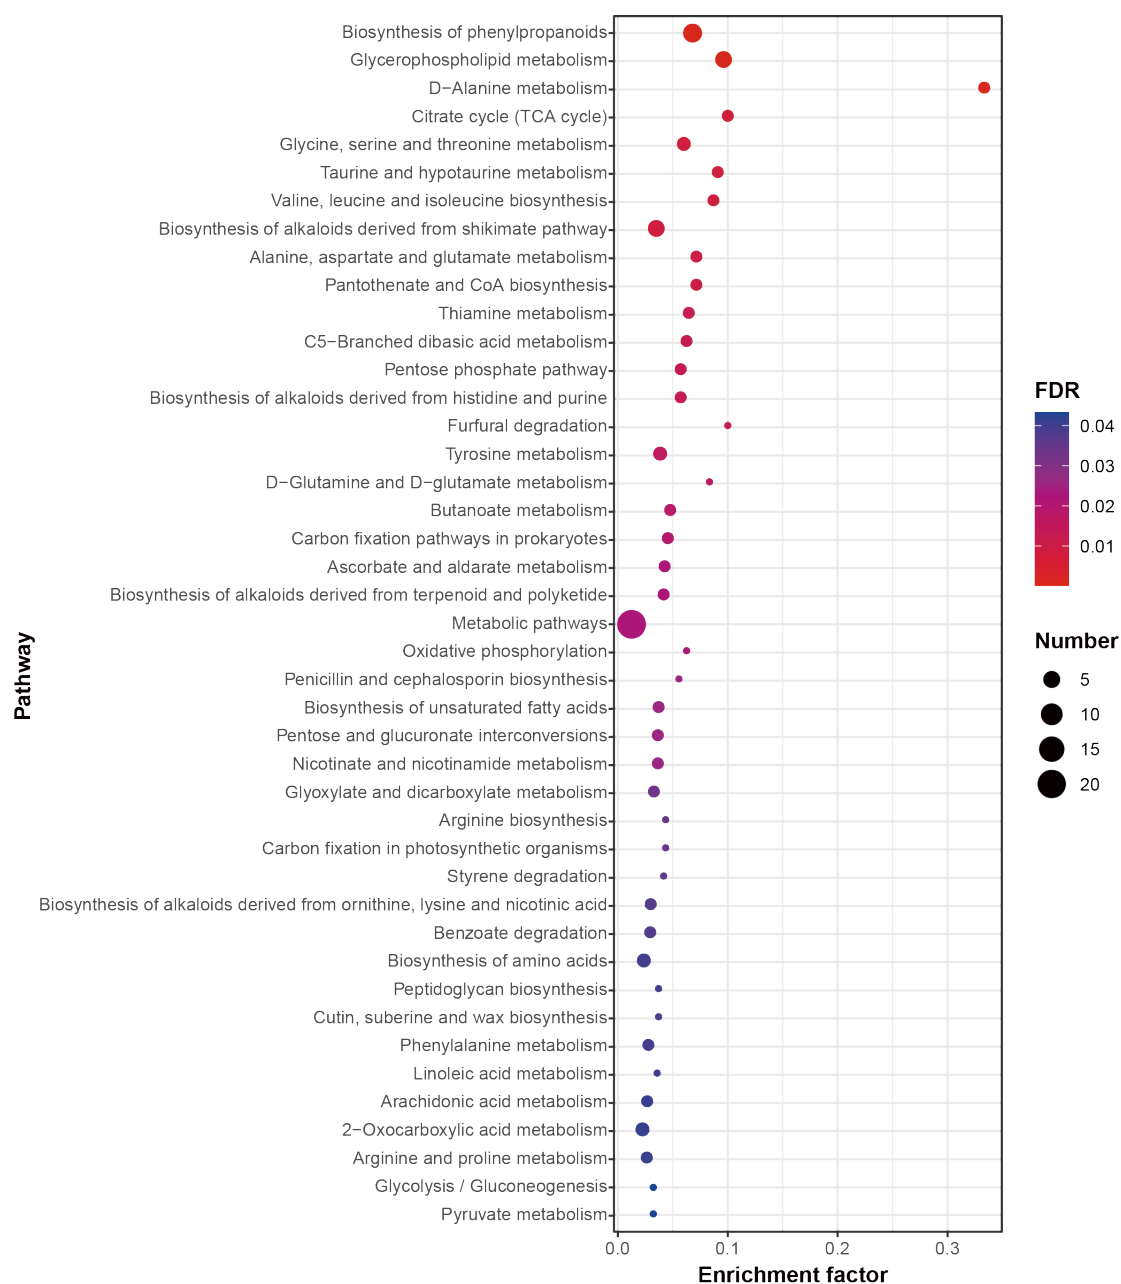

**Supplementary Figure 4** The KEGG pathway enrichment analysis based on the significantly altered metabolites selected in validation cohort data.

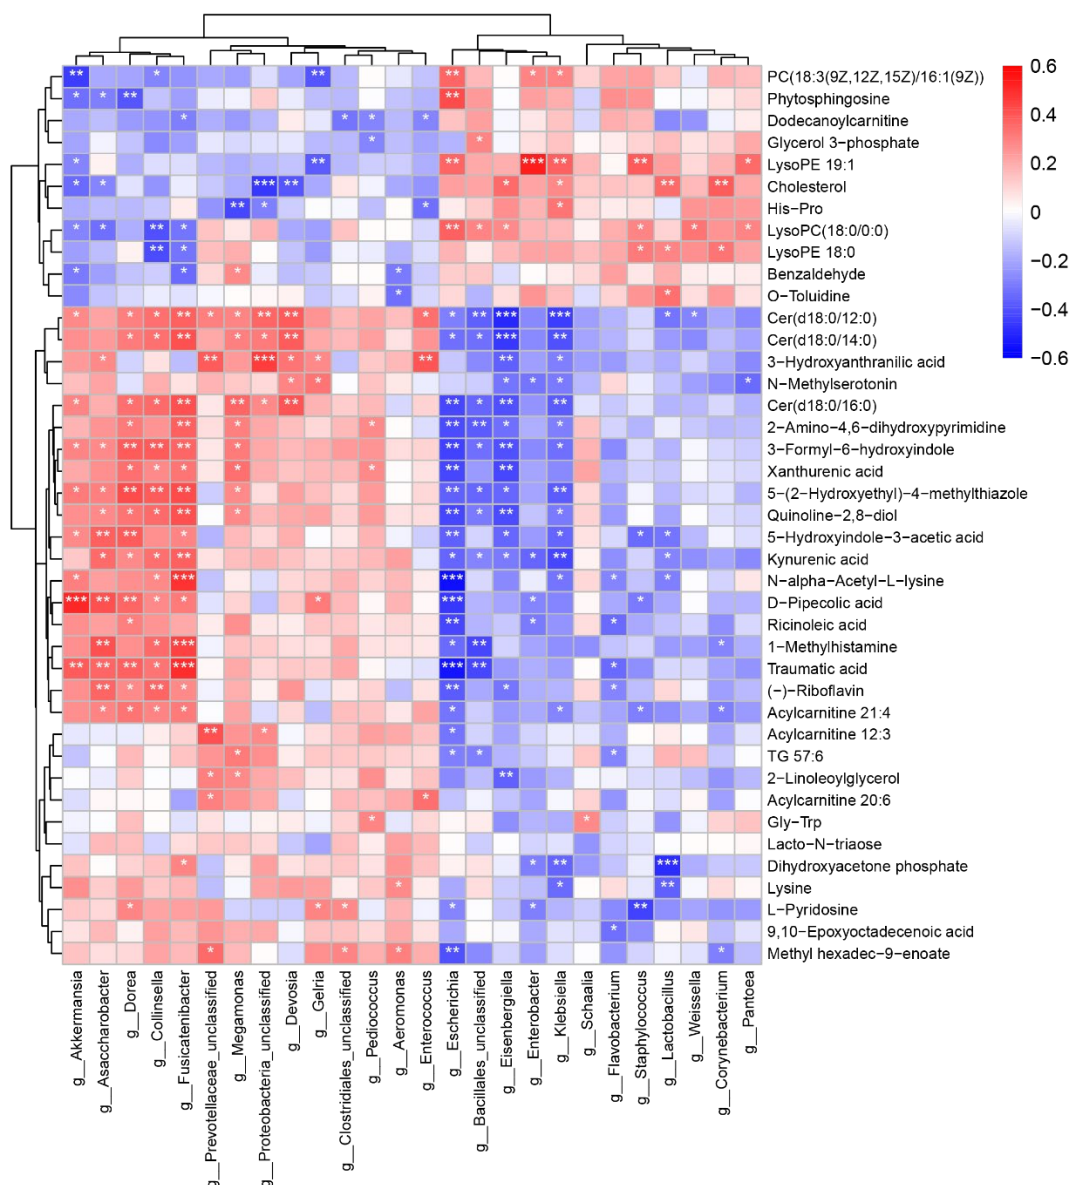

**Supplementary Figure 5** Heatmap was conducted to demonstrate the correlations between 26 differentially abundant genera and 41 differentially abundant metabolites (Spearman's correlation analysis). P-value, \*p<0.05; \*\*p<0.01; \*\*\*p<0.001

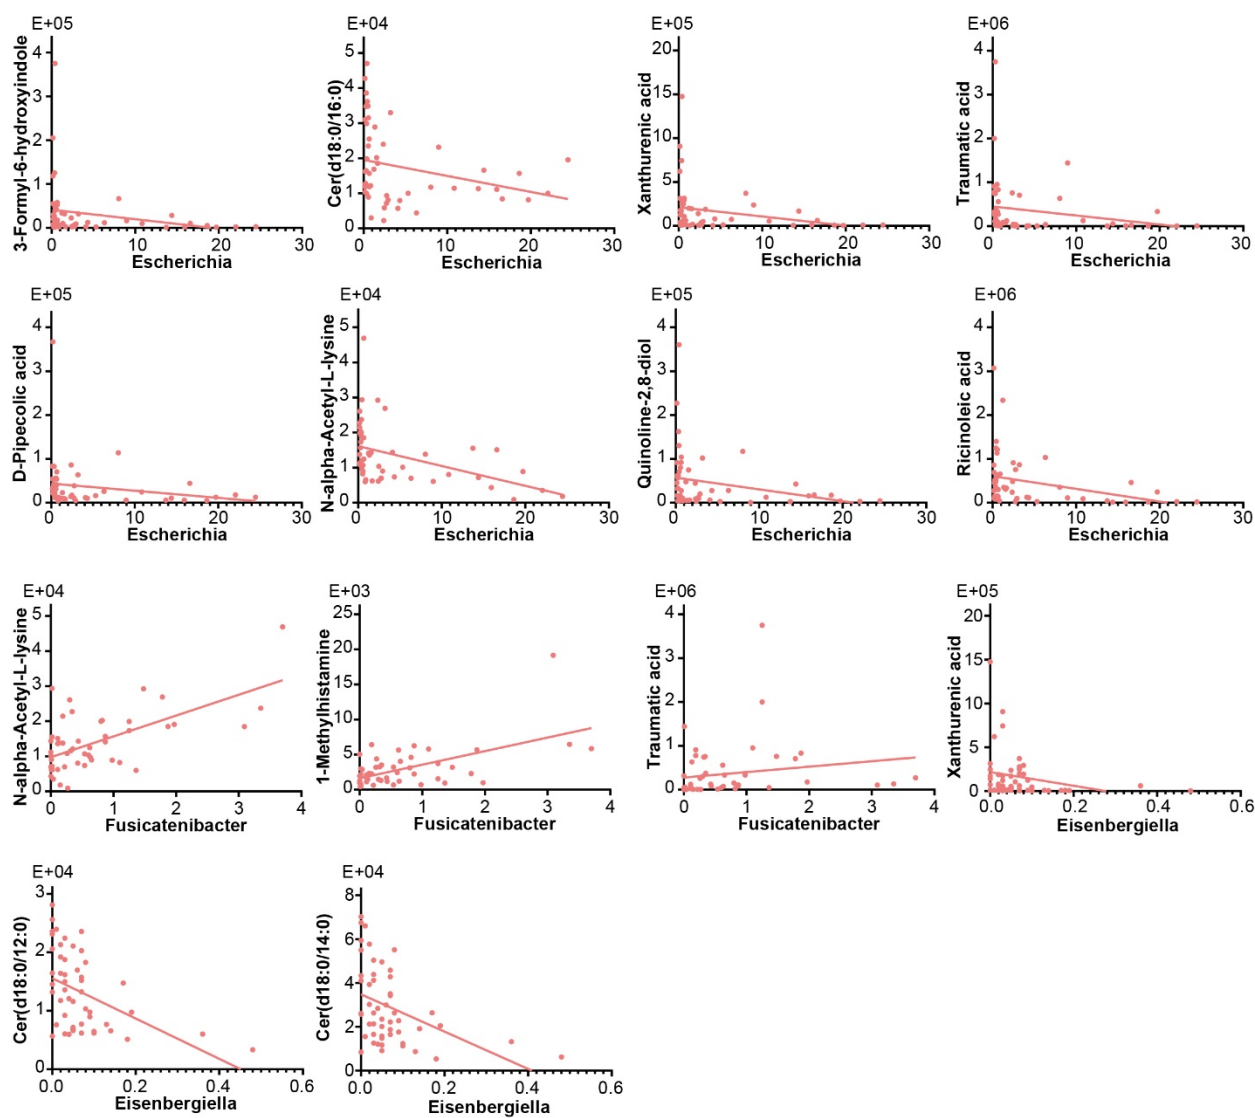

**Supplementary Figure 6** The x-y plots between the predominant bacteria (*Escherichia*, *Eisenbergiella* and *Fusicatenibacter*) and their relevant significantly altered metabolites.

## 1.2. Supplementary Tables

**Supplementary Table 1.** Demographic and clinical characteristics of each enrolled subject.

**Supplementary Table 2.** 26 differentially abundant genera were obtained by the Wilcoxon test.

**Supplementary Table 3.** AUC-values of candidate genera (LEfSe analysis, LDA>3, P-value<0.05).

**Supplementary Table 4.** Raw data and AUC-values of *Klebsiella* and *Fusicatenibacter* in validation cohort.

**Supplementary Table 5.** 171 pathways were found significantly altered between the RA and HC groups.

**Supplementary Table 6.** 35 pathways were significantly enriched based on MS2 metabolites.

**Supplementary Table 7.** The classification and alteration of differentially abundant metabolites.

**Supplementary Table 8.** KEGG pathway enrichment results based on differentially abundant metabolites selected in the validation cohort.

**Supplementary Table 9.** Spearman's correlation ( $\rho$ ) values between differential metabolites and differential microbes.
